# Supplementary material for: HOXA10 Regulates the Synthesis of Cholesterol in Endometrial Stromal Cells
Source: Front Endocrinol (Lausanne). 2022 Apr 25;13:852671. doi: 10.3389/fendo.2022.852671 (PMC9084188; doi:10.3389/fendo.2022.852671)
Supplement: Supplementary Table 2 — HOXA10 mRNA expression level in ESC and OESC. [file Table_2.xls]

## Sheet: Sheet1
Supplementary Table 2. HOXA10 mRNA expression level in ESC and OESC.
3D		2D
ESC	OESC	ESC	OESC
9.03504	5.02629	11.9221	8.96098
9.24639	3.44093	12.4442	8.72547
9.34422	7.8981	12.4876	8.71893
9.91746	1.60416	11.7573	8.48665
